# Supplementary material
Source: PubMed Central journal article supplement (PMC6936724)
Supplement: suppf1_dez210.pdf [file suppf1_dez210.pdf]

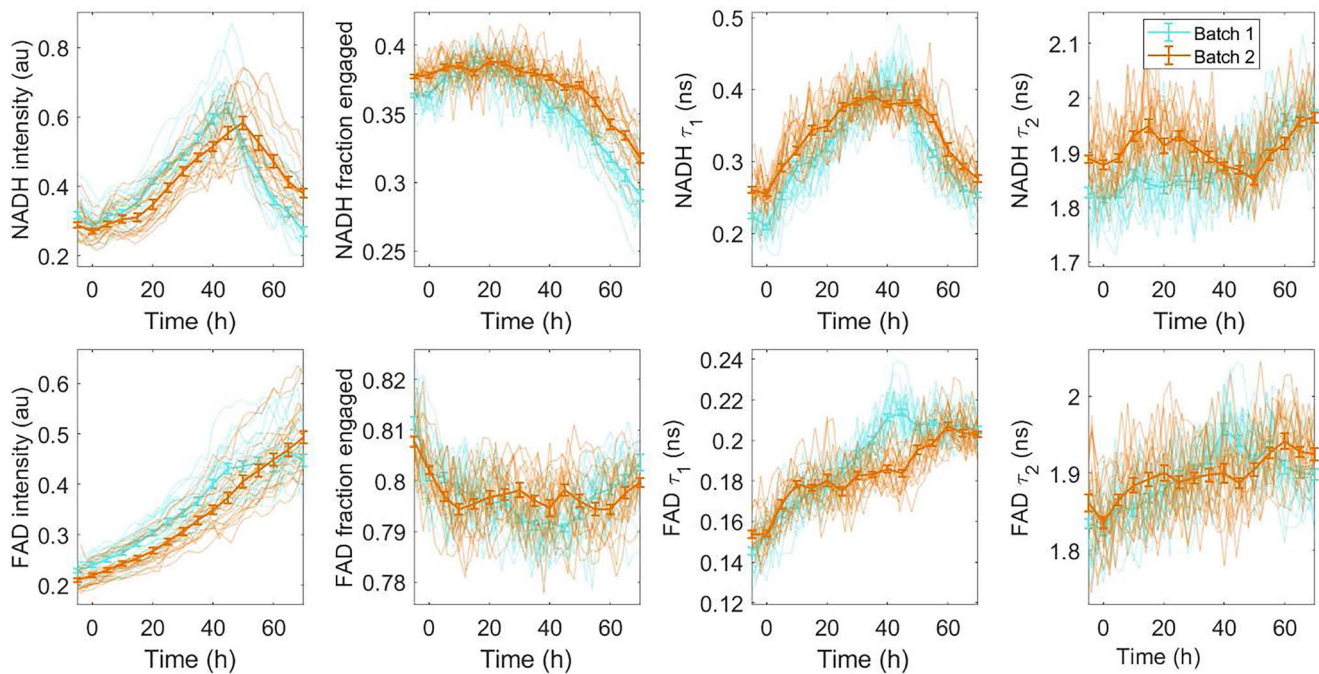

**Supplementary Figure S1** Metabolic trajectories from two separate time lapse acquisitions. There are  $n = 20$  embryos in Batch 1, and  $n = 19$  in Batch 2. Embryo parameter distributions exhibited similar absolute parameter values, as well as parameter trends over development. Both batches were pooled for the averages displayed in Figure 4.
