# Supplementary material
Source: PubMed Central journal article supplement (PMC6936724)
Supplement: suppmovie_dez210.pdf [file suppmovie_dez210.pdf]

**Supplementary Movie S1 Z-scan image series of a mouse blastocyst.** Nicotinamide adenine dinucleotide (NADH) fluorescence lifetime imaging microscopy (FLIM) intensity images are pseudo-colored blue on the left, and corresponding flavin adenine dinucleotide (FAD) images are pseudo-colored green on the right. Z-planes are spaced 2  $\mu\text{m}$  apart, and images are played at 8 frames/second. Bar is 25  $\mu\text{m}$ .

**Supplementary Movie S2 Z-scan image series of a mouse 1-cell embryo.** NADH FLIM intensity images are pseudo-colored blue on the left, and corresponding FAD images are pseudo-colored green on the right. Z-planes are spaced 2  $\mu\text{m}$  apart, and images are played at 8 frames/second. Bar is 25  $\mu\text{m}$ .

**Supplementary Movie S3 Time lapse image series of a one-cell mouse embryo undergoing the first mitotic division.** NADH intensity is displayed in grayscale, and second harmonic generation imaging (SHG) imaging of the spindle and zona pellucida are overlaid in magenta. Frames are 20 min apart, played at 4 frames/s. Bar is 25  $\mu\text{m}$ .

**Supplementary Movie S4 Time lapse image series of  $n = 8$  oocytes being exposed to oxamate (10 mM) and rotenone (1  $\mu\text{M}$ ) in series.** NADH FLIM intensity images are pseudo-colored blue on the left, and corresponding FAD images are pseudo-colored green on the right with SHG of spindles overlaid in magenta. Oxamate causes a drop in cytosolic NADH intensity. Rotenone causes an increase in NADH intensity and a decrease in FAD intensity. Oxamate does not disrupt the spindle, but rotenone causes it to dissociate. Text annotations indicate frames of chemical exposures. Frames are 4 min apart, played at 3 frames/s. Bar is 50  $\mu\text{m}$ .

**Supplementary Movie S5 Time lapse image series of mouse embryos developing on-stage from the one-cell to blastocyst stages.** NADH FLIM intensity images are pseudo-colored blue on the left, and corresponding FAD images are pseudo-colored green on the right. Frames are 2 h apart, played at 3 frames/s. Bar is 50  $\mu\text{m}$ .
